# Supplementary material for: Assessment of intra-tumoural colorectal cancer prognostic biomarkers using RNA in situ hybridisation
Source: PubMed Central journal article supplement (PMC6402718; doi:10.18632/oncotarget.26675), 2019-02-15
Supplement: oncotarget-10-1425-s001.pdf [file oncotarget-10-1425-s001.pdf]

## Assessment of intra-tumoural colorectal cancer prognostic biomarkers using RNA *in situ* hybridisation

### SUPPLEMENTARY MATERIALS

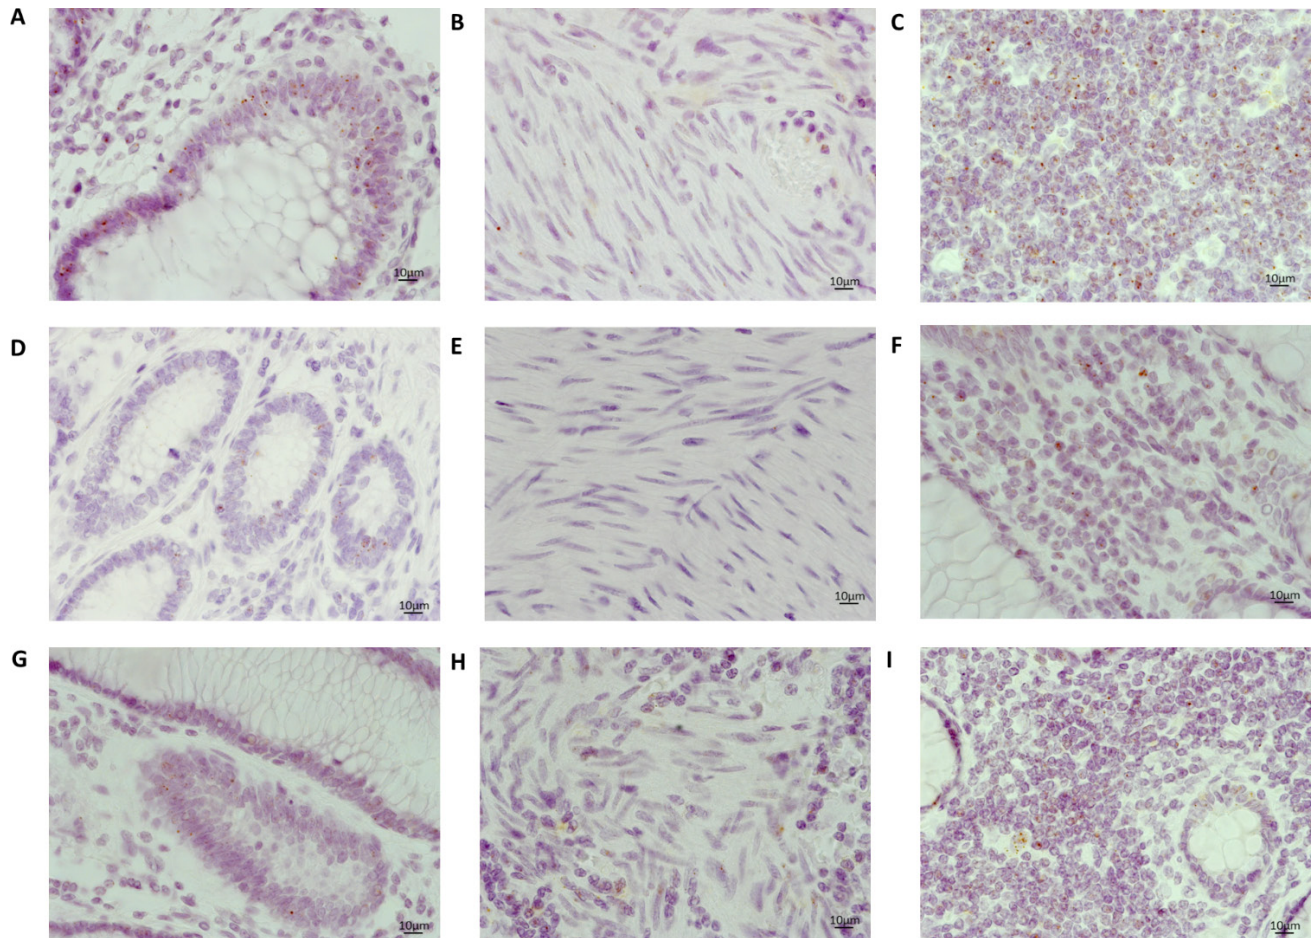

**Supplementary Figure 1:** Representative images of mRNA expression using RNAscope® on FFPE whole tissue section in different cell types from colorectal cancer cases at 40× magnification (**A**) *MLH1* in normal epithelial cells (**B**) *MLH1* in stromal cells (**C**) *MLH1* in lymphoid cells (**D**) *GFII* in normal epithelial cells (**E**) *GFII* in stromal cells (**F**) *GFII* in lymphoid epithelial cells (**G**) *TNFRSF11A* in normal epithelial cells (**H**) *TNFRSF11A* in stromal cells (**I**) *TNFRSF11A* in lymphoid cells.
